# Supplementary material
Source: publisher site journal article supplement (https://www.dovepress.com/article/461772)
Supplement: Supplementary file 1 [file get_supplementary_file.php]

Appendix: Tables: 1, 2, 3, 4, 5, 6

**Appendix Table 1. Bakhour variables and cough**

|  | **Cough** | | | | | | |
| --- | --- | --- | --- | --- | --- | --- | --- |
|  | **No** | | | **Yes** | | |  |
| **Variable** | **N** | **Mean/**  **%** | **SD** | **N** | **Mean/**  **%** | **SD** | **P value** |
| **Bakhour use** | 1269 |  |  | 343 |  |  | p>0.05 |
| No | 31 | 2% |  | 6 | 2% |  |  |
| Yes | 1238 | 98% |  | 337 | 98% |  |  |
| **Process** | 1269 |  |  | 343 |  |  | p>0.05 |
| Both | 289 | 23% |  | 101 | 29% |  |  |
| Coal | 940 | 74% |  | 233 | 68% |  |  |
| Electronic | 9 | 1% |  | 3 | 1% |  |  |
| Not Bakhour user | 31 | 2% |  | 6 | 2% |  |  |
| **Bakhour type** | 1269 |  |  | 343 |  |  | p>0.05 |
| Maamoul | 299 | 24% |  | 77 | 22% |  |  |
| Mastic | 335 | 26% |  | 105 | 31% |  |  |
| Oud | 540 | 43% |  | 136 | 40% |  |  |
| Other | 64 | 5% |  | 19 | 6% |  |  |
| Not Bakhour user | 31 | 2% |  | 6 | 2% |  |  |
| **Bakhour Frequency** | 1269 | 4.4 | 2.8 | 343 | 4.9 | 3.2 | P<0.01 |

**Appendix Table 2. Bakhour Variables and Cough Frequency**

|  | **Cough Frequency** | | | | | | | | | | | | |
| --- | --- | --- | --- | --- | --- | --- | --- | --- | --- | --- | --- | --- | --- |
|  | **No cough** | | | **Daily** | | | **Weekly** | | | **Monthly** | | |  |
| **Variable** | **N** | **Mean** | **SD** | **N** | **Mean** | **SD** | **N** | **Mean** | **SD** | **N** | **Mean** | **SD** | **Test** |
| **Bakhour use** | 1159 |  |  | 85 |  |  | 136 |  |  | 232 |  |  | p>0.05 |
| No | 29 | 3% |  | 2 | 2% |  | 3 | 2% |  | 3 | 1% |  |  |
| Yes | 1130 | 97% |  | 83 | 98% |  | 133 | 98% |  | 229 | 99% |  |  |
| **Process** | 1159 |  |  | 85 |  |  | 136 |  |  | 232 |  |  | P<0.05 |
| Both | 259 | 22% |  | 23 | 27% |  | 42 | 31% |  | 66 | 28% |  |  |
| Coal | 864 | 75% |  | 60 | 71% |  | 91 | 67% |  | 158 | 68% |  |  |
| Electronic | 7 | 1% |  | 0 | 0% |  | 0 | 0% |  | 5 | 2% |  |  |
| Not Bakhour user | 29 | 3% |  | 2 | 2% |  | 3 | 2% |  | 3 | 1% |  |  |
| **Bakhour Frequency** | 1159 | 4.3 | 2.8 | 85 | 5.1 | 3.2 | 136 | 5.4 | 3.2 | 232 | 4.8 | 3 | P<0.01 |

**Appendix Table 3. Bakhour Variables and Shortness of Breath (SoB)**

|  | **SoB** | | | | | | |
| --- | --- | --- | --- | --- | --- | --- | --- |
|  | **No** | | | **Yes** | | |  |
| **Variable** | **N** | **Mean/**  **%** | **SD** | **N** | **Mean/**  **%** | **SD** | **P value** |
| **Bakhour use** | 1256 |  |  | 356 |  |  | p>0.05 |
| No | 32 | 3% |  | 5 | 1% |  |  |
| Yes | 1224 | 97% |  | 351 | 99% |  |  |
| **Process** | 1256 |  |  | 356 |  |  | P<0.01 |
| Both | 279 | 22% |  | 111 | 31% |  |  |
| Coal | 935 | 74% |  | 238 | 67% |  |  |
| Electronic | 10 | 1% |  | 2 | 1% |  |  |
| Not Bakhour user | 32 | 3% |  | 5 | 1% |  |  |
| **Bakhour type** | 1256 |  |  | 356 |  |  | p>0.05 |
| Maamoul | 295 | 23% |  | 81 | 23% |  |  |
| Mastic | 333 | 27% |  | 107 | 30% |  |  |
| Oud | 535 | 43% |  | 141 | 40% |  |  |
| Other | 61 | 5% |  | 22 | 6% |  |  |
| Not Bakhour user | 32 | 3% |  | 5 | 1% |  |  |
| **Bakhour Frequency** | 1256 | 4.5 | 2.9 | 356 | 4.7 | 3.1 | p>0.05 |

|  | **SOB Frequency** | | | | | | | | | | | | |
| --- | --- | --- | --- | --- | --- | --- | --- | --- | --- | --- | --- | --- | --- |
|  | **No SoB** | | | **Daily** | | | **Weekly** | | | **Monthly** | | |  |
| **Variable** | **N** | **Mean/ %** | **SD** | **N** | **Mean/ %** | **SD** | **N** | **Mean/ %** | **SD** | **N** | **Mean/ %** | **SD** | **Test** |
| **Bakhour use** | 1175 |  |  | 86 |  |  | 158 |  |  | 193 |  |  | p>0.05 |
| No | 31 | 3% |  | 1 | 1% |  | 2 | 1% |  | 3 | 2% |  |  |
| Yes | 1144 | 97% |  | 85 | 99% |  | 156 | 99% |  | 190 | 98% |  |  |
| **Process** | 1175 |  |  | 86 |  |  | 158 |  |  | 193 |  |  | P<0.05 |
| Both | 254 | 22% |  | 28 | 33% |  | 48 | 30% |  | 60 | 31% |  |  |
| Coal | 882 | 75% |  | 57 | 66% |  | 107 | 68% |  | 127 | 66% |  |  |
| Electronic | 8 | 1% |  | 0 | 0% |  | 1 | 1% |  | 3 | 2% |  |  |
| Not Bakhour user | 31 | 3% |  | 1 | 1% |  | 2 | 1% |  | 3 | 2% |  |  |
| **Bakhour Frequency** | 1175 | 4.4 | 2.8 | 86 | 5.3 | 3.3 | 158 | 4.8 | 3 | 193 | 4.4 | 3 | P<0.01 |

**Appendix Table 4**: **Bakhour Variables and Shortness of Breath (SoB) Frequency**

**Appendix Table 5. Bakhour Variables and Wheezing**

|  | **Wheezing** | | | | | | |
| --- | --- | --- | --- | --- | --- | --- | --- |
|  | **No** | | | **Yes** | | |  |
| **Variable** | **N** | **Mean/**  **%** | **SD** | **N** | **Mean/**  **%** | **SD** | **P value** |
| **Bakhour use** | 1399 |  |  | 213 |  |  | p>0.05 |
| No | 31 | 2% |  | 6 | 3% |  |  |
| Yes | 1368 | 98% |  | 207 | 97% |  |  |
| **Process** | 1399 |  |  | 213 |  |  | P<0.01 |
| Both | 322 | 23% |  | 68 | 32% |  |  |
| Coal | 1038 | 74% |  | 135 | 63% |  |  |
| Electronic | 8 | 1% |  | 4 | 2% |  |  |
| Not Bakhour user | 31 | 2% |  | 6 | 3% |  |  |
| **Bakhour type** | 1399 |  |  | 213 |  |  | p>0.05 |
| Maamoul | 329 | 24% |  | 47 | 22% |  |  |
| Mastic | 385 | 28% |  | 55 | 26% |  |  |
| Oud | 585 | 42% |  | 91 | 43% |  |  |
| Other | 69 | 5% |  | 14 | 7% |  |  |
| Not Bakhour user | 31 | 2% |  | 6 | 3% |  |  |
| **Bakhour Frequency** | 1399 | 4.5 | 2.9 | 213 | 4.9 | 3.1 | p>0.05 |

**Appendix Table 6: Bakhour Variables and Allergic Rhinitis**

|  | **Allergic Rhinitis** | | | | | | |
| --- | --- | --- | --- | --- | --- | --- | --- |
|  | **No** | | | **Yes** | | |  |
| **Variable** | **N** | **Mean/**  **%** | **SD** | **N** | **Mean/**  **%** | **SD** | **P value** |
| **Bakhour use** | 1122 |  |  | 490 |  |  | p>0.05 |
| No | 32 | 3% |  | 5 | 1% |  |  |
| Yes | 1090 | 97% |  | 485 | 99% |  |  |
| **Process** | 1122 |  |  | 490 |  |  | p>0.05 |
| Both | 263 | 23% |  | 127 | 26% |  |  |
| Coal | 819 | 73% |  | 354 | 72% |  |  |
| Electronic | 8 | 1% |  | 4 | 1% |  |  |
| Not Bakhour user | 32 | 3% |  | 5 | 1% |  |  |
| **Bakhour type** | 1122 |  |  | 490 |  |  | P<0.01 |
| Maamoul | 269 | 24% |  | 107 | 22% |  |  |
| Mastic | 281 | 25% |  | 159 | 32% |  |  |
| Oud | 487 | 43% |  | 189 | 39% |  |  |
| Other | 53 | 5% |  | 30 | 6% |  |  |
| Not Bakhour user | 32 | 3% |  | 5 | 1% |  |  |
| **Bakhour Frequency** | 1122 | 4.5 | 2.9 | 490 | 4.6 | 1122 | p>0.05 |
